# Supplementary material for: Osteoporosis and Stress Urinary Incontinence in Women: A National Health Insurance Database Study
Source: MDPI journal article supplement (doi:10.3390/ijerph17124449), 2020-06-21
Supplement: s1 [file s1]

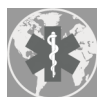

**Supplementary Table S1.** Cox proportional hazard model.

|                                                                | No. of event | Observed<br>person-years | Incidence density<br>(per 1000 person-years) | Crude HR    | 95% CI           | Adjusted HR | 95% CI           |
|----------------------------------------------------------------|--------------|--------------------------|----------------------------------------------|-------------|------------------|-------------|------------------|
| Model 1 <sup>†</sup> (outcome: <b>pelvic floor disorders</b> ) |              |                          |                                              |             |                  |             |                  |
| Type                                                           |              |                          |                                              |             |                  |             |                  |
| No                                                             | 261          | 57892                    | 4.5                                          | 1           |                  | 1           |                  |
| Osteoporosis                                                   | 220          | 26552                    | 8.3                                          | <b>1.84</b> | <b>1.54-2.21</b> | <b>1.87</b> | <b>1.56-2.24</b> |
| Pathologic fracture                                            | 31           | 2540                     | 12.2                                         | <b>2.65</b> | <b>1.83-3.85</b> | <b>2.24</b> | <b>1.53-3.26</b> |
| Model 2 <sup>†</sup> (outcome: <b>pelvic organ prolapse</b> )  |              |                          |                                              |             |                  |             |                  |
| Osteoporosis                                                   |              |                          |                                              |             |                  |             |                  |
| No                                                             | 25           | 58452                    | 0.4                                          | 1           |                  | 1           |                  |
| Yes                                                            | 13           | 29693                    | 0.4                                          | 1.02        | 0.52-2.00        | 1.03        | 0.53-2.01        |
| Model 3 <sup>‡</sup> (outcome: <b>fecal incontinence</b> )     |              |                          |                                              |             |                  |             |                  |
| Osteoporosis                                                   |              |                          |                                              |             |                  |             |                  |
| No                                                             | 3            | 58506                    | 0.1                                          | 1           |                  | 1           |                  |
| Yes                                                            | 2            | 29715                    | 0.1                                          | 1.31        | 0.22-7.84        | 1.24        | 0.21-7.48        |
| Model 4 <sup>†</sup> (outcome: <b>urinary incontinence</b> )   |              |                          |                                              |             |                  |             |                  |
| Type                                                           |              |                          |                                              |             |                  |             |                  |
| No                                                             | 233          | 57952                    | 4.0                                          | 1           |                  | 1           |                  |
| Osteoporosis                                                   | 207          | 26581                    | 7.8                                          | <b>1.94</b> | <b>1.61-2.34</b> | <b>1.98</b> | <b>1.64-2.38</b> |
| Pathological fracture                                          | 29           | 2541                     | 11.4                                         | <b>2.78</b> | <b>1.89-4.09</b> | <b>2.30</b> | <b>1.56-3.40</b> |

†Adjusted for age, sex, hypertension, hyperlipidemia, ischemic heart disease, cerebrovascular disease, chronic liver disease, chronic kidney disease, diabetes, chronic obstructive pulmonary disease, and thyroid disease. ‡Adjusted for age, sex, hypertension, hyperlipidemia, ischemic heart disease, and cerebrovascular disease. OS is classified as simple OS or pathological fractures. The outcomes of the three pelvic floor diseases, including urinary incontinence, fecal incontinence, and pelvic organ prolapse, were compared.
